# Supplementary material for: Copper( i ) as a reducing agent for the synthesis of bimetallic PtCu catalytic nanoparticles
Source: Royal Society of Chemistry journal article supplement (doi:10.1039/d3na00158j), 2023-01-01
Supplement: d3na00158j1.pdf [file d3na00158j1.pdf]

# Copper(I) as reducing agent for the synthesis of bimetallic PtCu catalytic nanoparticles

*Adrian Fernández-Lodeiro*<sup>\*,1,2</sup>, *Javier Fernández-Lodeiro*<sup>,1,2</sup>, *Noelia Losada-Garcia*<sup>,3</sup>, *Silvia Nuti*<sup>,1,2</sup>, *Jose-Luis Capelo-Martinez*<sup>,1,2</sup>, *Jose M. Palomo*<sup>\*3</sup>, *Carlos Lodeiro*<sup>\*1,2</sup>

<sup>1</sup> BIOSCOPE Group, LAQV@REQUIMTE, Chemistry Department, Faculty of Science and Technology, NOVA University Lisbon, Caparica Campus, Caparica 2829-516, Portugal.

<sup>2</sup> PROTEOMASS Scientific Society, BIOSCOPE GROUP Laboratories, Departamental Building, Ground Floor, FCT-UNL Caparica Campus, 2829-516 Caparica, Portugal

<sup>3</sup> Instituto de Catálisis y Petroleoquímica (ICP), CSIC C/Marie Curie 2, 28049, Madrid, Spain

## Table of contents

|                                                                                                                                                                                                                                                                                                                                                     |   |
|-----------------------------------------------------------------------------------------------------------------------------------------------------------------------------------------------------------------------------------------------------------------------------------------------------------------------------------------------------|---|
| <b>Figure S1.</b> (a) UV–Vis spectra of the interaction of $K_2PtCl_4$ with CuBr and EDTA (molar ratio Pt/Cu = 1/6 and Pt/Cu/EDTA= 1/6/10) at 22°C. (b) colour of the Cu+Pt dissolution before adding EDTA, c) colour of the Cu+Pt dissolution after adding EDTA and d) colour of the supernatant Cu(II)-EDTA with the band centered at 732 nm..... | 3 |
| <b>Figure S2.</b> (a, b) DLS spectra of the interaction of $K_2PtCl_4$ with CuBr and EDTA (molar ratio Pt/Cu = 1/6 and Pt/Cu/EDTA= 1/6/10) at 40 °C and 60 °C. (c, d) DLS spectra of the interaction of $K_2PtCl_4$ with CuBr and EDTA (molar ratio Pt/Cu = 1/3 and Pt/Cu = 1/6) at 60 °C. ....                                                     | 4 |
| <b>Figure S3.</b> $\zeta$ -Potential of the PtCu1 and PtCu2 in water after the centrifugation cycles.....                                                                                                                                                                                                                                           | 5 |
| <b>Figure S4.</b> (a-b) line-scanning profiles recorded along the path marked by the yellow line (a) (platinum green line and copper red line) and (c) the EDS spectrum.....                                                                                                                                                                        | 5 |
| <b>Figure S5.</b> HRTEM image of PtCu1, (b) representative lattice fringe under higher magnification and (c) determination of the inter-planar distance using plot profile.....                                                                                                                                                                     | 6 |
| <b>Figure S6.</b> HRTEM of PtCu1 and the corresponding FFT showing spots assigned to Pt (111) (marked as blue), Cu (111) (marked as red) and PtCu (200) (marked as green).....                                                                                                                                                                      | 6 |
| <b>Figure S7.</b> PtCu1 High-resolution XPS spectra of a) Pt4f and b) Cu2p .....                                                                                                                                                                                                                                                                    | 7 |
| <b>Figure S8.</b> HRTEM of PtCu2 and the corresponding FFT showing spots assigned to Pt (111) (marked as blue) and Cu (111) (marked as red). ....                                                                                                                                                                                                   | 7 |
| <b>Figure S9.</b> EDS spectra of PtCu2, showing the presence of Pt and Cu in the final nanoparticles. The gold signal is due to the tem grid.....                                                                                                                                                                                                   | 8 |
| <b>Figure S10.</b> PtCu2 High-resolution XPS spectra of a) Pt4f and b) Cu2p. ....                                                                                                                                                                                                                                                                   | 8 |
| <b>Table S1.</b> ICP results of PtCu1 and PtCu2 nanomaterials .....                                                                                                                                                                                                                                                                                 | 9 |

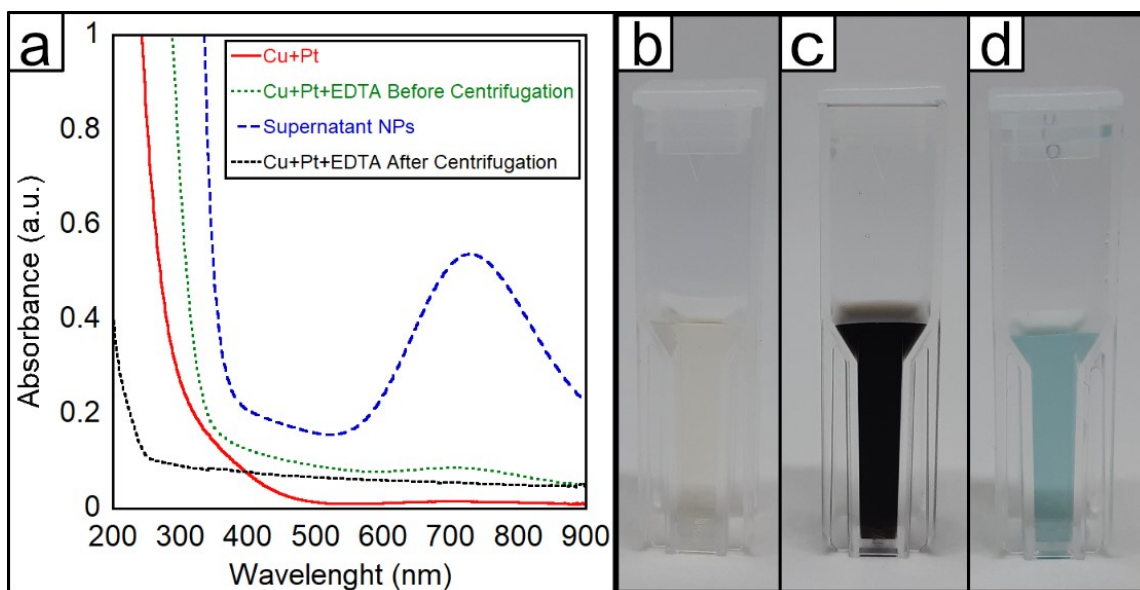

**Figure S1.** (a) UV–Vis spectra of the interaction of  $K_2PtCl_4$  with CuBr and EDTA (molar ratio Pt/Cu = 1/6 and Pt/Cu/EDTA= 1/6/10) at 22°C. (b) colour of the Cu+Pt dissolution before adding EDTA, c) colour of the Cu+Pt dissolution after adding EDTA and d) colour of the supernatant Cu(II)-EDTA with the band centered at 732 nm.

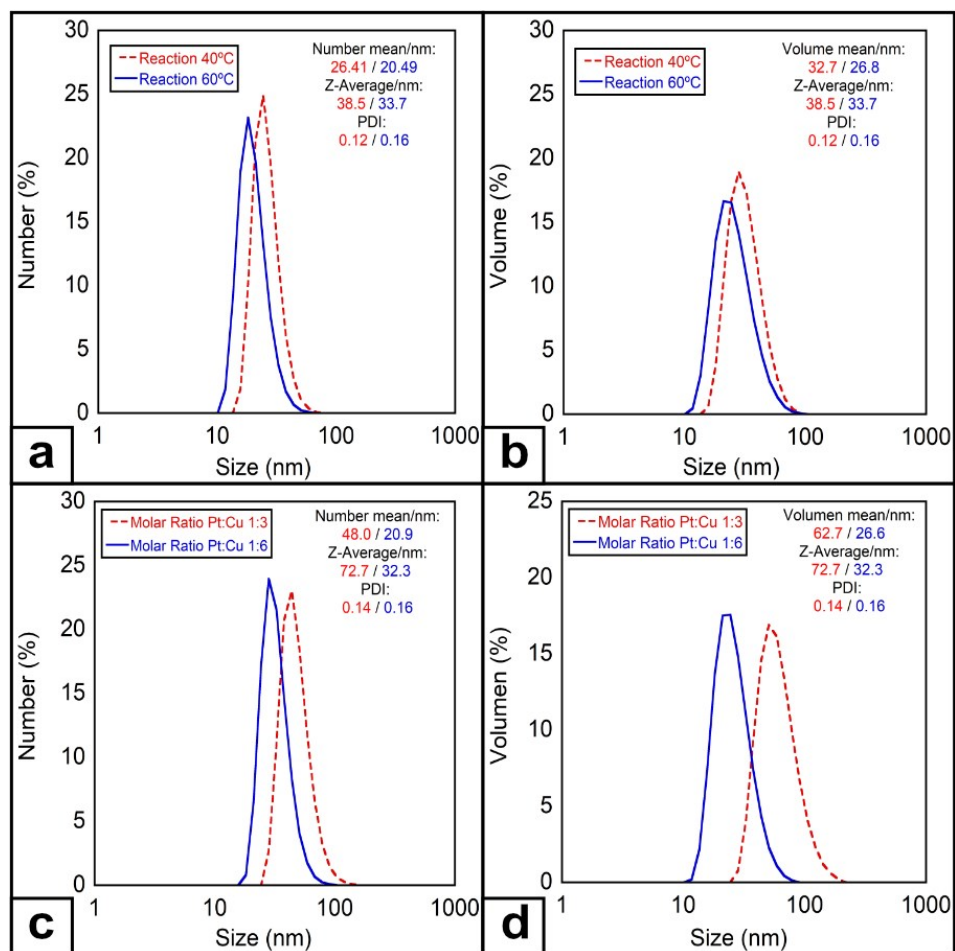

**Figure S2.** (a, b) DLS spectra of the interaction of  $K_2PtCl_4$  with CuBr and EDTA (molar ratio Pt/Cu = 1/6 and Pt/Cu/EDTA= 1/6/10) at 40 °C and 60 °C. (c, d) DLS spectra of the interaction of  $K_2PtCl_4$  with CuBr and EDTA (molar ratio Pt/Cu = 1/3 and Pt/Cu = 1/6) at 60 °C.

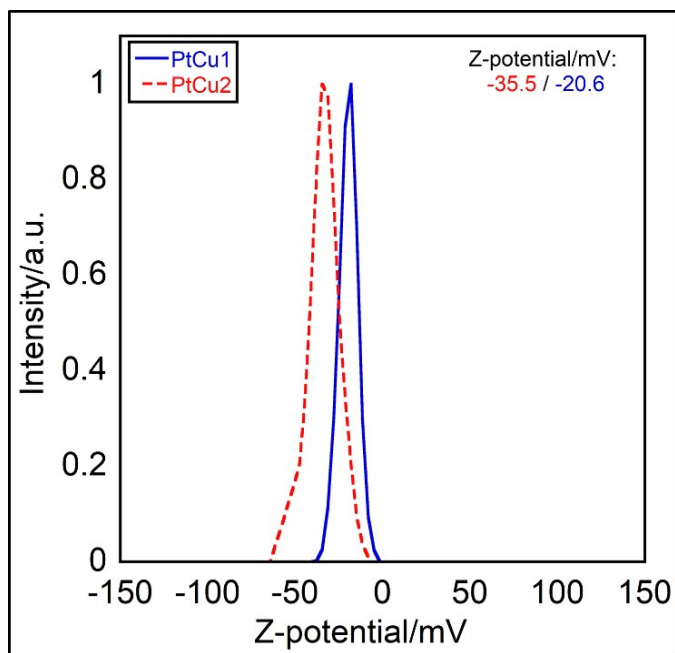

**Figure S3.**  $\zeta$ -Potential of the PtCu1 and PtCu2 in water after the centrifugation cycles.

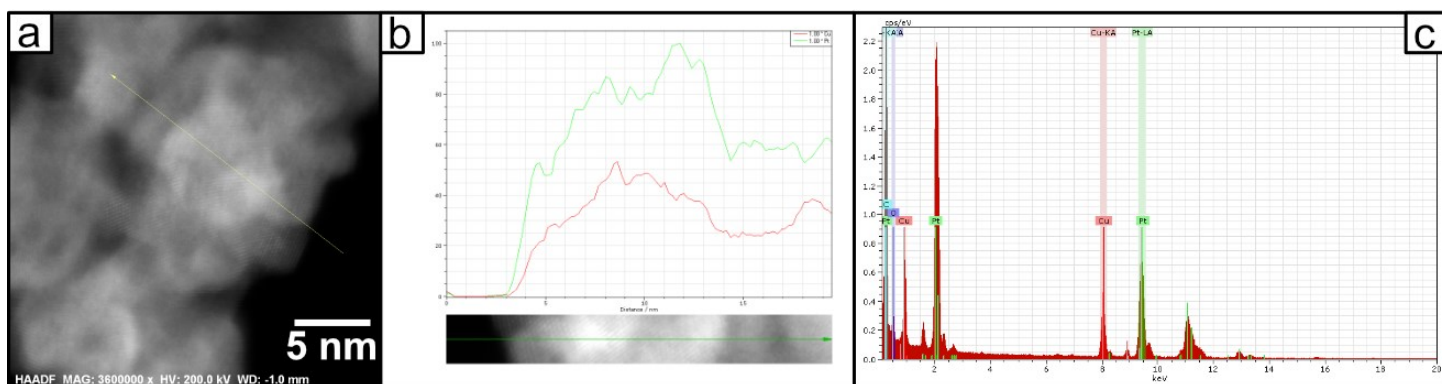

**Figure S4.** (a-b) line-scanning profiles recorded along the path marked by the yellow line (a) (platinum green line and copper red line) and (c) the EDS spectrum.

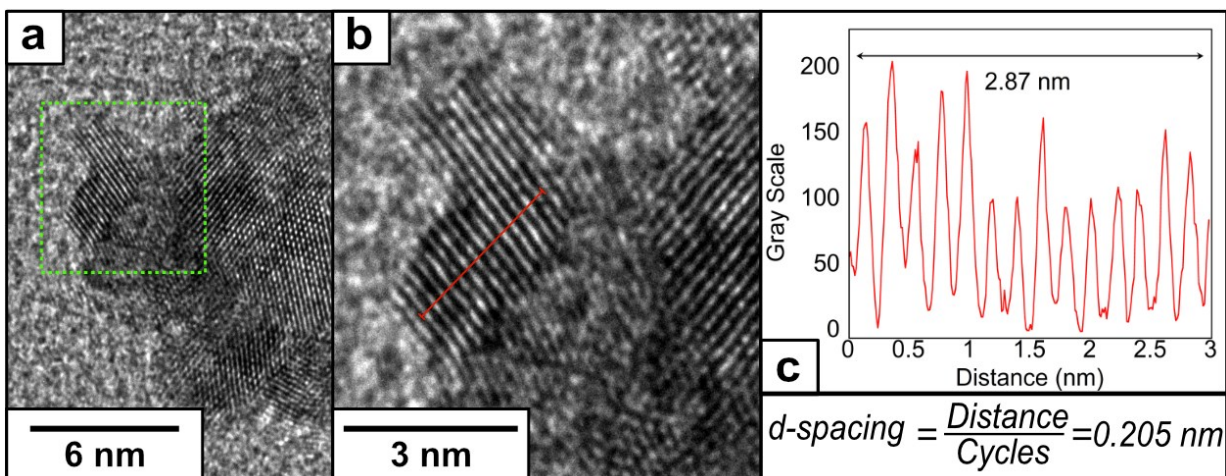

**Figure S5.** HRTEM image of PtCu<sub>1</sub>, (b) representative lattice fringe under higher magnification and (c) determination of the inter-planar distance using plot profile.

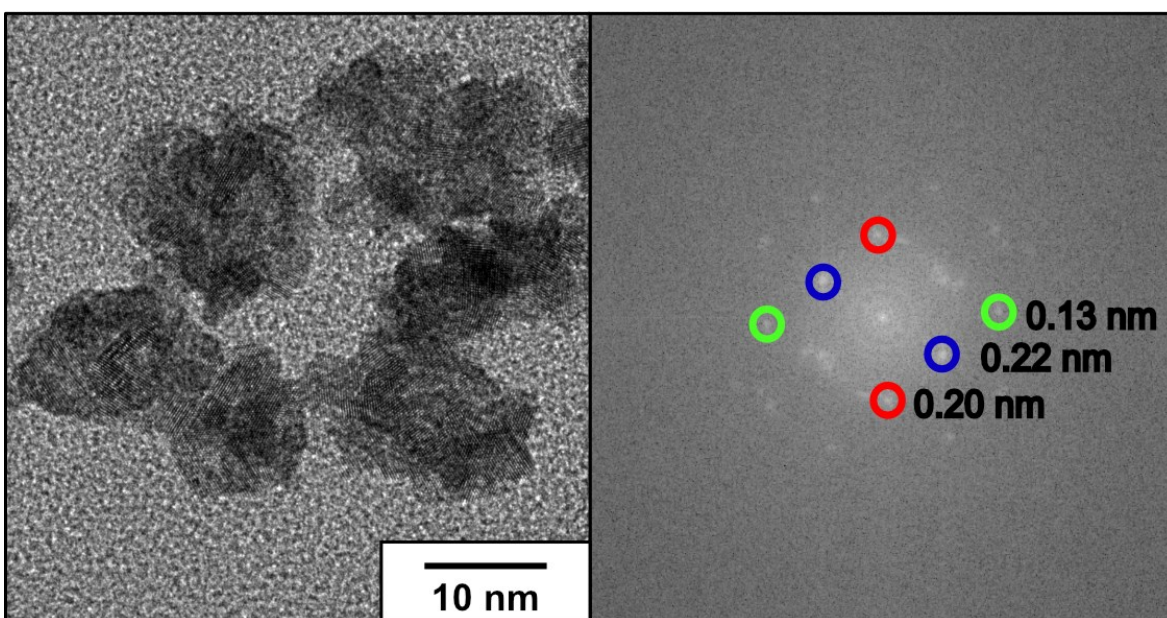

**Figure S6.** HRTEM of PtCu<sub>1</sub> and the corresponding FFT showing spots assigned to Pt (111) (marked as blue), Cu (111) (marked as red) and PtCu (200) (marked as green).

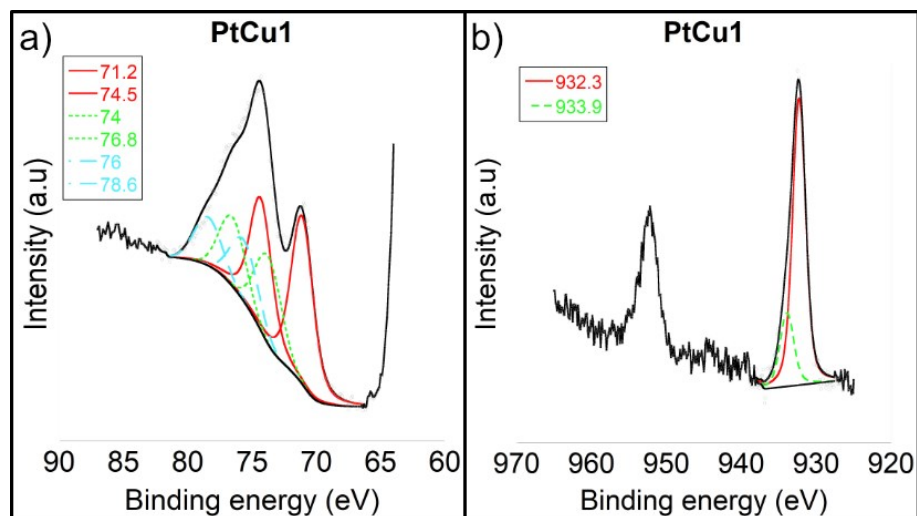

**Figure S7.** PtCu1 High-resolution XPS spectra of a) Pt4f and b) Cu2p

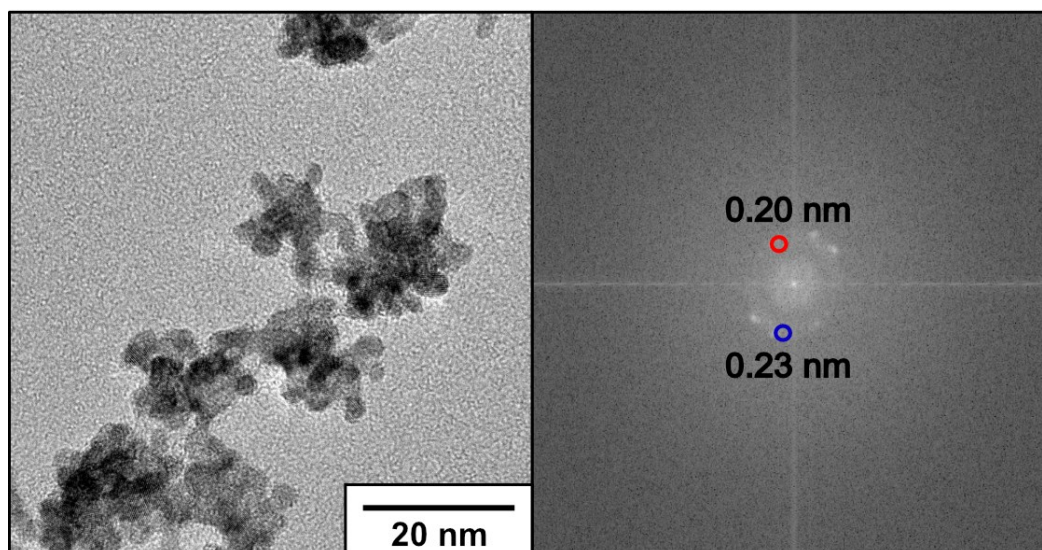

**Figure S8.** HRTEM of PtCu2 and the corresponding FFT showing spots assigned to Pt (111) (marked as blue) and Cu (111) (marked as red).





## ICP analysis

### Digestion procedure

1 mL of sample was added to 50 mL of Mili-Q water. The sample was kept in agitation during 16 h. It was added  $1.0 \pm 0.1$  mL conc.  $\text{HNO}_3$  and  $0.50 \pm 0.05$  mL conc.  $\text{HCl}$  to each sample. The samples were digested for 3 hours  $95 \pm 5^\circ\text{C}$ . After 3 hours at  $95 \pm 5^\circ\text{C}$ , the samples were taken from heat source and let cool for at least 30 minutes. The volume of the samples was reconstituted to 50 mL with Mili-Q water.

**Table S1.** ICP results of PtCu1 and PtCu2 nanomaterials

| Sample | Cu [ppm] | Pt [ppm] |
|--------|----------|----------|
| PtCu1  | 52       | 150      |
| PtCu2  | 48       | 110      |
